# 1 Burden and Determinants of Self-Reported High Blood Pressure Among Women of 2 Reproductive Age In Tanzania: Evidence from 2022 Tanzania Demographic and Health 3 Survey.

## 4 5 Authors and Affiliations:

6 Nelson Musilanga,<sup>1\*</sup> Hussein Nasib,<sup>1</sup> Ambokile Mwakibolwa,<sup>1</sup> Given Jackson,<sup>1</sup> Frank  
7 Shayo,<sup>1</sup> Keneth Kijusya,<sup>1</sup> Samson Henry,<sup>1</sup> Clarkson Nhangwa,<sup>1</sup> Saleh Girukwigomba,<sup>1</sup> Joseph  
8 Keshi,<sup>1</sup> Mussa Luwumba.<sup>1</sup>

9 <sup>1</sup> Department of Internal Medicine, Maranatha Hospital, Mbeya, Tanzania.

10  
11 Correspondence should be addressed to Nelson Musilanga; [nelson@maranathahospitals.co.tz](mailto:nelson@maranathahospitals.co.tz)

## 12 13 Abstract

14 **Background:** High blood pressure, commonly referred to as hypertension, remains a  
15 prevalent global health concern characterized by elevated arterial pressure. Its multifactorial  
16 etiology involves genetic predisposition, lifestyle factors, and comorbidities, posing  
17 significant risks such as cardiovascular diseases, stroke, and kidney diseases. Therefore, the  
18 aim of this study was to assess the burden and determinants of self-reported high blood  
19 pressure among women of reproductive age in Tanzania.

20  
21 **Methods:** We utilized population-based cross-sectional data obtained from the Tanzania  
22 Demographic and Health Survey (TDHS) 2022, specifically phase VIII. The analysis  
23 involved a weighted sample of 15,254 women aged 15-49 years. The outcome variable was  
24 self-reported high blood pressure. Multivariable logistic regression models were employed to  
25 examine the independent variables associated with self-reported high blood pressure, and the

26 results were presented as adjusted odds ratios (aOR) with a 95% confidence interval (CI).

27 The significance level was set at  $p < 0.05$  for all analyses.

28

29 **Results:** Overall, the mean age of study participants was  $29.3 \pm 9.8$  years, with a self-  
30 reported high blood pressure burden of 6.6% among women of reproductive age in Tanzania.

31 Moreover, increased age correlated with higher odds of high blood pressure compared to

32 women aged 15-19 years. Those with a secondary level of education exhibited a higher

33 likelihood of high blood pressure (aOR: 1.76, 95% CI: 1.36-2.28,  $p < 0.001$ ) in contrast to

34 women with no education. Married (aOR: 1.57, 95% CI: 1.19-2.08,  $p=0.002$ ) and widowed

35 (aOR: 1.54, 95% CI: 1.11-2.12,  $p=0.009$ ) individuals were more prone to high blood pressure

36 than those who were never married. Additionally, women in higher wealth brackets showed a

37 significantly elevated risk of high blood pressure compared to those in the poorest wealth

38 group. Giving birth once or twice in the last 5 years reduced the odds by 20% (aOR: 0.80,

39 95% CI: 0.67-0.96,  $p < 0.001$ ). Conversely, self-reported poor health status and recent visits

40 to health facilities were associated with significantly higher odds of high blood pressure

41 (aOR: 2.87, 95% CI: 1.76-4.67,  $p < 0.001$ ) and (aOR: 1.38, 95% CI: 1.20-1.60,  $p < 0.001$ ),

42 respectively.

43

44 **Conclusion:** This study highlights the substantial burden of high blood pressure among

45 reproductive-age women, urging heightened awareness and proactive screening measures. It

46 unveils intricate factors contributing to elevated blood pressure, suggesting tailored strategies

47 involving lifestyle changes, education, and improved healthcare access. These findings

48 prompt targeted interventions, emphasizing the need for collaborative efforts among

49 stakeholders to effectively curb this health burden.

50

51 **Keywords:** Hypertension, Blood pressure, Noncommunicable diseases, Tanzania

## 52 **Background**

53

54 High blood pressure (BP) is an important modifiable risk factor contributing to heart failure,  
55 valvular heart diseases, atrial fibrillation, chronic kidney disease, coronary heart disease, and  
56 stroke [1]. High BP or hypertension is defined as a systolic BP greater or equal to 140 mmHg  
57 and/or diastolic BP greater or equal to 90 mmHg or a self-reported case under medication [2].  
58 By 2025, the global burden of high BP is projected to reach 1.56 billion; two-thirds of this  
59 burden is anticipated in low- and middle-income countries [3, 4]. In the sub-Saharan Africa  
60 region, non-communicable diseases (NCDs), including high BP, are projected to emerge as  
61 the leading causes of morbidity and mortality by 2030 [5, 6]. According to the World Health  
62 Organization (WHO) cardiovascular diseases (CVD) account for 17.9 million deaths  
63 annually, making them the most prevalent among NCDs [7].

64

65 The development of high BP is influenced by both modifiable and non-modifiable risk  
66 factors, such as increasing age, gender, genetic predisposition, unhealthy eating habits,  
67 physical inactivity, cigarette smoking, excessive alcohol consumption, and obesity [8–10].  
68 Furthermore, a preponderance of previous research has also reported that respondent's level  
69 of education [11, 12], place of residence [13, 14], occupation [15], lack of health insurance  
70 coverage [16], and presence of other comorbidities [14, 17], play pivotal roles in the  
71 development of high BP.

72

73 Despite several limitations, such as poor patient-clinician communication, self-diagnosis in  
74 the absence of an adequate explanation for symptoms, or issues related to health literacy, self-  
75 reported medical history data are frequently employed in epidemiological studies to evaluate  
76 the prevalence of medical conditions in the general population. Self-reporting of specific

77 medical conditions is a simple and cost-effective method that relies on individuals willingly  
 78 disclosing their behaviors, beliefs, attitudes, or intentions regarding a particular condition.  
 79 Therefore, due to its simplicity and low cost in obtaining health information from individuals,  
 80 self-reporting has become an integral approach for continuous population monitoring,  
 81 informing policies aimed at reducing the burden of various diseases [18, 19].

82

83 In light of the above, the current study aims to determine the burden and determinants of self-  
 84 reported high blood pressure among women of reproductive age in Tanzania.

85  
 86  
 87  
 88  
 89  
 90  
 91  
 92  
 93  
 94  
 95  
 96  
 97  
 98  
 99  
 100  
 101  
 102  
 103  
 104  
 105  
 106  
 107  
 108  
 109  
 110  
 111  
 112  
 113  
 114  
 115  
 116  
 117  
 118

## Methods

### Study design, Period and Setting.

This was a population-based cross-sectional study design conducted in Tanzania located in the Eastern Africa from 24<sup>th</sup> February 2022 to 21<sup>st</sup> July 2022. Administratively, Tanzania is divided into 3 regions including the islands of Zanzibar. In turn, each administrative region is sub-divided into districts, each district into wards and each ward into villages (lowest administrative units of a country). Based on the 2022 population and housing census, Tanzania has a population of over 61.7 million people, of which 51.3% comprises females [20].

### Data Sources

This secondary data analysis was based on the 2022 Tanzania Demographic and Health Surveys (TDHS). This is a nationally representative surveys conducted every four years by the National Bureau of Statistics (NBS) and Zanzibar Bureau of Statistics (ZBS) with financial and technical assistance by ICF International provisioned through the United States Agency for International Development (USAID)-funded Monitoring and Evaluation to Assess and Use Results (MEASURE) DHS program in collaboration with other donor agencies. The 2022 TDHS dataset is publicly available and can be accessed through the DHS program database at <http://dhsprogram.com/data/available-datasets.cfm>.

### Sampling procedure

The 2022 TDHS sample involved a multi-stage stratified cluster sampling design based on a list of enumeration areas (EAs) delineated for the 2012 Tanzania Population and Housing

Census (2012 PHC). The EAs were selected with a probability proportional to their size within each sampling stratum. A total of 629 clusters were selected. Among the 629 EAs, 211 were from urban areas and 418 were from rural areas. Then, 26 households were selected systematically from each cluster, for a total anticipated sample size of 16,354 households for the 2022 TDHS. The detailed sampling procedure has been reported previously [21].

### **Study population and sample size**

All women of reproductive age, 15 to 49 years, were included in this study. The individual questionnaire of the 2022 TDHS dataset was used to extract the study-specific outcome and explanatory variables from a nationally representative sample of 15,254 women, yielding a response rate of 97%.

### **Data Collection**

Data collection was carried out from February 24, 2022 to July 21, 2022 by 18 field teams, 3 teams for Zanzibar and 15 teams for Tanzania Mainland. During fieldwork, enumeration area maps, listing forms, and local leaders assisted the trained field staff in identifying the sampled clusters and households. The team leaders and computer-assisted personal interviewing supervisors were responsible for data quality in the field.

### **Outcome variable**

The main outcome variable in this study was self-reported high blood pressure. Participants were asked if they had ever been told they have high blood pressure, eliciting a dichotomized response of 'Yes' or 'No.'

### **Independent Variable**

Demographic and socioeconomic variables, such as the respondent's age, place of residence, highest education level, wealth index status, marital status, number of children ever born, working status, coverage by health insurance, self-reported health status, visiting health facility in the last 12 months, and cigarette use, were included as independent variables. The respondent's age was grouped into 5-year age brackets. Place of residence was categorized as rural or urban. The highest level of education was separated into four categories: no education, primary level, secondary level, and higher education. The combined wealth index status was categorized into five groups: poorest, poorer, middle, richer, and richest. Marital status was also classified into six groups: never married, married, living with a partner, widowed, divorced, and separated. The total number of children ever born was categorized into 0-children, 1-5 children, and >5 children. Other variables such as the respondent's working status, coverage by health insurance, self-reported health status, visiting a health facility in the last 12 months, and cigarette smoking were dichotomized into 'Yes' or 'No'. Our choice of these independent variables was influenced by variables included in the DHS datasets and previous studies that found these variables to be important factors influencing high blood pressure [8–17].

## **Statistical analysis**

Analysis was conducted using both descriptive and inferential statistical methods. The descriptive statistics are expressed as numbers with percentages in the form of tables while the inferential statistics adopted were bivariate and multivariate analysis. The bivariate analysis was performed using chi-square, and the multivariate analysis was performed using binary logistic regression. The logistic regression model was used to investigate the relationship between the independent variables and the outcome variable. The generated adjusted odds ratios (aOR) were estimated to assess the strength of the associations and used

the 95% confidence intervals (CIs) for significance testing. The level of significance was set at  $p < 0.05$  (2-tailed) for all the analyses. Sample weighting was applied to allow for adjustments for the cluster sampling design and sampling probabilities across clusters and strata. Statistical Product and Service Solutions (SPSS) for Macintosh version 25 (IBM Inc., Chicago, Ill., USA) was used to run all analysis.

## **Ethical consideration**

This study was based on the analysis of population-based dataset available in the public domain with all identifiers removed. The objectives of this study was approved by MEASURE DHS/ICF International and permission was granted to access, download and use the dataset with authorization number 194069. During the surveys, the protocols and data collection procedures were approved by relevant authorities in Tanzania mainland and Zanzibar. In the data collection procedures, all participants were asked to provide verbal informed consent after the consent statement was read to them which emphasized the voluntary nature of the survey. Interviews were conducted under the private conditions afforded by the environments encountered. Confidentiality was adhered to by making sure that names of respondents were not written in the data collection tools and hence were anonymous.



## Results

### Sociodemographic characteristics of the study participants

As shown in table 1, a total of 15,254 women of reproductive age from all regions of Tanzania were included in the study. The mean age of study participants was  $29.3 \pm 9.8$ , ranging from 15 to 49 years old. Participants exhibited a range of educational backgrounds, with 48.6% predominantly holding a primary education level, while 1.4% possessed higher education qualifications. A majority were married (44.3%), and nearly two-thirds of participants (64.3%) were living in rural areas. Furthermore, participants represented diverse economic profiles, with the poorest accounting for 14.9% and the richest comprising 26.5%.

Regarding health and lifestyle factors, a significant portion of participants (94.3%) were not covered by health insurance, 99.5% had not smoked cigarettes, and approximately 53.8% reported visiting a health facility in the past 12 months. Additionally, 52.7% reported having a good health status.

### Burden and determinants of self-reported high blood pressure

Overall, 1,014 (6.6%) of the study participants self-reported having high blood pressure, as indicated in table 2. Comparatively, individuals with high blood pressure exhibited a higher proportion among those aged  $\geq 40$  years (40.5% vs. 18.1%,  $p < 0.001$ ) than participants without high blood pressure. The group with high blood pressure also showed a higher representation of individuals in the richer and richest wealth status categories (70.6% vs. 47.1%,  $p < 0.001$ ). Additionally, a significantly proportion of women who had given birth to

more than three children were observed in the high blood pressure group (45.3% vs. 30.6%,  $p < 0.01$ ). However, percentages of cigarette smoking and having given birth more than twice in the past 5 years were comparable between the groups (0.5% vs. 0.4% and 2.0% vs. 2.4%, respectively). Furthermore, the multivariate logistic regression model was fitted with baseline covariates associated with self-reported high blood pressure determined through bivariate analysis at a significance level of  $p < 0.05$ , as indicated in table 2. Several factors were independently associated with self-reported high blood pressure among women of reproductive age in Tanzania. These factors include age-groups: 20-24 (aOR: 2.45, 95% CI: 1.64-3.65,  $p < 0.001$ ), 25-29 (aOR: 3.77, 95% CI: 2.48-5.71,  $p < 0.001$ ), 30-34 (aOR: 4.60, 95% CI: 2.99-7.07,  $p < 0.001$ ), 35-39 (aOR: 6.26, 95% CI: 4.04-9.70,  $p < 0.001$ ), 40-44 (aOR: 7.62, 95% CI: 4.86-11.95,  $p < 0.001$ ), and 45-49 (aOR: 11.78, 95% CI: 7.45-18.62,  $p < 0.001$ ); secondary level of education (aOR: 1.76, 95% CI: 1.36-2.28,  $p < 0.001$ ); marital status-married (aOR: 1.57, 95% CI: 1.19-2.08,  $p=0.002$ ) and widowed (aOR: 1.54, 95% CI: 1.11-2.12,  $p=0.009$ ); middle wealth status (aOR: 2.28, 95% CI: 1.64-3.16,  $p < 0.001$ ); richer wealth status (aOR: 2.98, 95% CI: 2.14-4.15,  $p < 0.001$ ); richest wealth status (aOR: 5.06, 95% CI: 3.58-7.15,  $p < 0.001$ ); having a self-reported bad health status (aOR: 2.87, 95% CI: 1.76-4.67,  $p < 0.001$ ); visiting a health facility in the past 12 months (aOR: 1.38, 95% CI: 1.20-1.60,  $p < 0.001$ ); and giving birth once or twice in the last 5 years (aOR: 0.80, 95% CI: 0.67-0.96,  $p < 0.001$ ).

## Discussion

High blood pressure, commonly referred to as hypertension, is increasingly imposing a significant disease burden, particularly in low and middle-income countries (LMICs) like Tanzania. Therefore, this study aimed to determine the prevalence and determinants of self-reported high blood pressure among women of reproductive age in Tanzania, utilizing the most recent nationally representative data. The study found a 6.6% prevalence of high blood pressure among women of reproductive age. Several factors independently correlated with self-reported high blood pressure, including older age-groups, secondary education level, marital status (being married or widowed), middle, richer, and richest wealth statuses, self-reported poor health status, recent health facility visits, and having given birth once or twice in the last 5 years.

Our findings are consistent with a prior report from a community-based survey in rural Mwanza [22], which recorded a relatively similar prevalence rate of 8%. However, our findings were notably lower compared to several other community-based studies across the country. For instance, studies in Northern Tanzania reported a prevalence of 28.0% [23], while another in rural Morogoro noted 29.3% [24], and the national representative STEPS survey in 2012 found a prevalence of 25.9% [25]. The lower prevalence in our study might be due to the inclusion of younger participants, as 38.9% were aged 15–24 years, contrasting previous studies that involved older participants, where high blood pressure is more common.

Additionally, it is important to note that many individuals with hypertension in our study might not be aware of their condition [24].

When we compare our findings with reports from other countries, we uncover a wide range of outcomes. A cross-sectional survey conducted in Nakaseke health district in Uganda reported a quite similar prevalence rate of self-reported high blood pressure at 6.3% [26]. Population-based studies among women in Kenya and Benin reported prevalence rates of 9.38% and 9.9%, respectively [27, 28]. Additionally, other studies indicated higher prevalence rates of high blood pressure than those observed in our study. For instance, a study in Northern China reported a prevalence of 19.0% [29], South Africa reported a prevalence of 23.6% [19], while Brazil showed 24.1% [11], and the overall age-standardized rate among women in the United States reached 27.0% [30]. These differences underscore significant disparities in the prevalence of self-reported high blood pressure among diverse populations, potentially influenced by factors such as methodological differences, population healthcare-seeking behavior, socioeconomic status, sociocultural norms, and awareness within a population regarding specific health conditions.

In this study, the likelihood of self-reported high blood pressure increased with age, ranging from 14.4% among individuals aged 25–29 to 23.3% among those aged 44–49 years, aligning with previous reports [31, 32]. Age-related elevation in high blood pressure has been associated with arterial stiffness and reduced vessel elasticity due to arteriosclerotic structural changes and calcification [33]. Women with secondary level of educations were more likely to report high blood pressure compared to those with no education. However, those with higher education were less likely to have high blood pressure 2.4%. Individuals with higher

levels of education often exhibit a greater awareness of health-related behaviors, including regular exercise, balanced diets, and stress management [34, 35].

The loss of a spouse through widowhood can have adverse effects on a woman's health, including an increased risk of high blood pressure as observed in our study. The emotional stress, social isolation, and potential lifestyle changes following the loss of a partner can contribute to higher blood pressure levels [36, 37]. Conversely, the association between being married and self-reported high blood pressure in our setting may be influenced by a significant number of participants, the majority of whom were married (44.3%).

Furthermore, richest wealth status had a 5-fold increased risk of high blood pressure among women. This is contrast with reports from previous studies [38, 39]. However, increased wealth might afford access to certain lifestyle choices that can negatively impact blood pressure, such as excessive alcohol consumption, high-calorie diets, or a lack of emphasis on regular exercise [40, 41].

A self-reported bad health status was linked to more than twice the increased risk of high blood pressure compared to individuals reporting very good health status. Poor health status leads to physiological changes impacting the cardiovascular system, heightening the risk of high blood pressure. Additionally, women who had visited a health facility in the past 12 months were more likely to report high blood pressure than those who had not. This may be attributed to the incomplete functioning of community-level screening, consequently resulting in a higher detection rate at the health facility level. These findings highlight the need for healthcare providers to implement community-level screening for high blood pressure.

363

364 Moreover, the decreased likelihood of high blood pressure among women who have given  
365 birth once or twice in the past 5 years aligns with the recommendation to wait at least 18 to  
366 24 months after a live birth before attempting another pregnancy [42]. Multiple pregnancies  
367 with inadequate spacing may heighten the risk of gestational hypertension or preeclampsia  
368 due to physiological changes during pregnancy, including elevated blood volume and  
369 hormonal fluctuations. These factors can potentially predispose women to chronic high blood  
370 pressure later in life.

371

## 372 **Strength and Limitation**

373 Our study has a few limitations. Firstly, the cross-sectional design restricts our ability to  
374 establish cause-and-effect relationships among the identified variables. Therefore, these  
375 findings should be interpreted cautiously. Additionally, reliance on self-reported high blood  
376 pressure might introduce recall bias, potentially leading to some degree of misreporting or  
377 overreporting of high blood pressure prevalence among women of reproductive age.  
378 However, the study's key strengths include its large sample size and national  
379 representativeness, suggesting that the sampled population may genuinely represent the  
380 Tanzanian population.

381

## 382 **Conclusion and Implication**

383 The culmination of this study underscores several significant insights, shaping our  
384 understanding and potentially guiding interventions in this demographic. Firstly, the  
385 prevalence rates observed in this study reflect an alarming trend, highlighting the substantial  
386 burden of high blood pressure among women of reproductive age. The figures underscore the  
387 imperative need for heightened awareness, proactive screening measures, and targeted

interventions aimed at mitigating the risks associated with high blood pressure among women.

Moreover, the determinants identified within this research elucidate the complex interplay of various factors contributing to elevated blood pressure levels. Understanding these determinants provides a framework for developing tailored strategies encompassing lifestyle modifications, education initiatives, and improved healthcare accessibility.

Importantly, the implications drawn from this study reverberate across public health policies, clinical practice, and community-based interventions. Implementing targeted screening programs, fostering health-promoting behaviors, and enhancing healthcare access are pivotal in mitigating the burden of high blood pressure in this demographic. Additionally, an interdisciplinary approach encompassing healthcare providers, public health officials, policymakers, and community stakeholders is imperative to effectuate sustainable and impactful changes

423  
424  
425  
426  
427  
428  
429  
430  
431  
432  
433  
434  
435  
436  
437  
438

### 439 **Abbreviation**

440

441 aOR: Adjusted odds ratios; BP: Blood pressure; CI: Confidence intervals; CVD:  
442 Cardiovascular diseases; EAs: Enumeration areas; LMICs: Low and middle-income  
443 countries; MEASURE: Monitoring and Evaluation to Assess and Use Results; NCD: Non-  
444 communicable diseases; NBS: National Bureau of Statistics; PHC: Population and Housing  
445 Census; SPSS: Statistical Product and Service Solutions; TDHS: Tanzania Demographic and  
446 Health Surveys; USAID: United States Agency for International Development (USAID);  
447 WHO: World Health Organization; ZBS: Zanzibar Bureau of Statistics.

448

449

### 450 **Declarations**

451

### 452 **Ethical Approval and Consent to participate**

453 The protocols and data collection procedures received approval from relevant authorities in  
454 both Tanzania mainland and Zanzibar, including the National Institute of Medical Research  
455 (NIMR), Zanzibar Medical Research Ethical Committee (ZAMREC), the Institutional  
456 Review Board of ICF International, and the Centers for Disease Control and Prevention in  
457 Atlanta. All participants were asked to provide verbal informed consent after the consent  
458 statement was read to them, emphasizing the voluntary nature of the survey. Interviews were



conducted under the private conditions afforded by the environments encountered. Confidentiality was ensured by making sure that names of respondents were not written in the data collection tools, and hence, the responses remained anonymous. The approval to use the data in this study was obtained from MEASURE DHS with authorization number 194069.

#### **Consent for publication**

Not Applicable.

#### **Availability of data and materials**

The dataset generated and/or analyzed during the present study is available in the DHS Program archive repository [<https://dhsprogram.com/data/available-datasets.cfm>].

#### **Competing Interest**

The authors declare that they have no competing interests.

#### **Funding**

This study did not receive funding from any public, commercial, or not-for-profit funding agency.

#### **Author's contribution**

NM, HN, GJ, FS, and CN contributed to the conception and design of the study, acquisition of data, data analysis and interpretation, and drafting and revising of the manuscript. SG, AM, SH, KK, JK, ML, and EM critically revised the manuscript for its intellectual content. All authors have read and approved the final draft of the manuscript.

## Acknowledgement

We are grateful to the Monitoring and Evaluation to Assess and Use Results-Demographic and Health Surveys (MEASURE DHS) and the National Bureau of Statistics (NBS) for providing free access to the original dataset.

## Reference

1. Fuchs FD, Whelton PK. High Blood Pressure and Cardiovascular Disease. *Hypertension*. 2020;75:285–92.
2. Chobanian A V, Bakris GL, Black HR, Cushman WC, Green LA, Izzo JLJ, et al. The Seventh Report of the Joint National Committee on Prevention, Detection, Evaluation, and Treatment of High Blood Pressure: the JNC 7 report. *JAMA*. 2003;289:2560–72.
3. Mills KT, Bundy JD, Kelly TN, Reed JE, Kearney PM, Reynolds K, et al. Global Disparities of Hypertension Prevalence and Control: A Systematic Analysis of Population-Based Studies From 90 Countries. *Circulation*. 2016;134:441–50.
4. Dhungana RR, Pandey AR, Shrestha N. Trends in the Prevalence, Awareness, Treatment, and Control of Hypertension in Nepal between 2000 and 2025: A Systematic Review and Meta-Analysis. *Int J Hypertens*. 2021;2021:6610649. doi:10.1155/2021/6610649.
5. Gouda HN, Charlson F, Sorsdahl K, Ahmadzada S, Ferrari AJ, Erskine H, et al. Burden of non-communicable diseases in sub-Saharan Africa, 1990-2017: results from the Global Burden of Disease Study 2017. *Lancet Glob Heal*. 2019;7:e1375–87.
6. Yuyun MF, Sliwa K, Kengne AP, Mocumbi AO, Bukhman G. Cardiovascular Diseases in Sub-Saharan Africa Compared to High-Income Countries: An Epidemiological Perspective.

512 Glob Heart. 2020;15:15.

513 7. World Health Organization. Noncommunicable diseases. [https://www.who.int/news-](https://www.who.int/news-room/fact-sheets/detail/noncommunicable-diseases)

514 [room/fact-sheets/detail/noncommunicable-diseases](https://www.who.int/news-room/fact-sheets/detail/noncommunicable-diseases). Accessed 16 Nov 2023.

515 8. Yusuf S, Joseph P, Rangarajan S, Islam S, Mente A, Hystad P, et al. Modifiable risk

516 factors, cardiovascular disease, and mortality in 155□722 individuals from 21 high-income,

517 middle-income, and low-income countries (PURE): a prospective cohort study. *Lancet*

518 (London, England). 2020;395:795–808.

519 9. Gbadamosi MA, Tlou B. Modifiable risk factors associated with non-communicable

520 diseases among adult outpatients in Manzini, Swaziland: a cross-sectional study. *BMC Public*

521 *Health*. 2020;20:665. doi:10.1186/s12889-020-08816-0.

522 10. Brandão MP, Sa-Couto P, Gomes G, Beça P, Reis J. Factors Associated with

523 Cardiovascular Disease Risk among Employees at a Portuguese Higher Education

524 Institution. *Int J Environ Res Public Health*. 2022;19.

525 11. Malta DC, Bernal RTI, Andrade SSC de A, Silva MMA da, Velasquez-Melendez G.

526 Prevalence of and factors associated with self-reported high blood pressure in Brazilian

527 adults. *Rev Saude Publica*. 2017;51 suppl 1:11s.

528 12. Sun K, Lin D, Li M, Mu Y, Zhao J, Liu C, et al. Association of education levels with the

529 risk of hypertension and hypertension control: a nationwide cohort study in Chinese adults. *J*

530 *Epidemiol Community Health*. 2022;76:451 LP – 457. doi:10.1136/jech-2021-217006.

531 13. Sharma JR, Mabhida SE, Myers B, Apalata T, Nicol E, Benjeddou M, et al. Prevalence of

532 Hypertension and Its Associated Risk Factors in a Rural Black Population of Mthatha Town,

533 South Africa. *Int J Environ Res Public Health*. 2021;18.

534 14. Kandala N-B, Nnanatu CC, Dukhi N, Sewpaul R, Davids A, Reddy SP. Mapping the

535 Burden of Hypertension in South Africa: A Comparative Analysis of the National 2012

536 SANHANES and the 2016 Demographic and Health Survey. *Int J Environ Res Public Health*.

2021;18.

15. Joshi S, Thapa BB. Socioeconomic risk factors of hypertension and blood pressure among persons aged 15-49 in Nepal: a cross-sectional study. *BMJ Open*. 2022;12:e057383.

16. Jones HJ, Ibemere S, Gaillard T, Harris A, Anthony J, Shambley-Ebron D. Factors Associated with Self-Reported Hypertension Among Black Women. *J Natl Black Nurses Assoc*. 2020;31:32–8.

17. Ab Majid NL, Rodzlan Hasani WS, Mat Rifin H, Robert Lourdes TG, Jane Ling MY, Saminanthan TA, et al. Self-reported diabetes, hypertension and hypercholesterolemia among older persons in Malaysia. *Geriatr Gerontol Int*. 2020;20 Suppl 2:79–84.

18. Pihlajamäki M, Uitti J, Arola H, Ollikainen J, Korhonen M, Nummi T, et al. Self-reported health problems and obesity predict sickness absence during a 12-month follow-up: a prospective cohort study in 21 608 employees from different industries. *BMJ Open*. 2019;9:e025967. doi:10.1136/bmjopen-2018-025967.

19. Ntenda PAM, El-Meidany WMR, Tiruneh FN, Motsa MPS, Nyirongo J, Chirwa GC, et al. Determinants of self-reported hypertension among women in South Africa: evidence from the population-based survey. *Clin Hypertens*. 2022;28:39.

20. Tanzania National Bureau Of Statistics. 2022 Population and Housing Census. 2022. <https://sensa.nbs.go.tz/>. Accessed 17 Nov 2023.

21. Ministry of Health (MoH) [Tanzania Mainland], Ministry of Health (MoH) [Zanzibar], National Bureau of Statistics (NBS), Office of the Chief Government Statistician (OCGS) 2022. Tanzania Demographic and Health Survey and Malaria Indicator Survey 2022 Final Report. Dodoma, Tanzania, Rockville, Maryland, USA MoH, NBS, OCGS, ICF. 2022.

22. Mosha NR, Mahande M, Juma A, Mboya I, Peck R, Urassa M, et al. Prevalence, awareness and factors associated with hypertension in North West Tanzania. *Glob Health Action*. 2017;10:1321279.

23. Galson SW, Staton CA, Karia F, Kilonzo K, Lunyera J, Patel UD, et al. Epidemiology of hypertension in Northern Tanzania: a community-based mixed-methods study. *BMJ Open*. 2017;7:e018829.
24. Muhihi AJ, Anacli A, Mpembeni RNM, Sunguya BF, Leyna G, Kakoko D, et al. Prevalence, Awareness, Treatment, and Control of Hypertension among Young and Middle-Aged Adults: Results from a Community-Based Survey in Rural Tanzania. *Int J Hypertens*. 2020;2020:9032476.
25. Mary M, Kagaruki G. Tanzania Steps Survey Report: Ministry of Health and Social Welfare and National Institute for Medical Research. 2013.
26. Siddharthan T, Kalyesubula R, Morgan B, Ermer T, Rabin TL, Kayongo A, et al. The rural Uganda non-communicable disease (RUNCD) study: prevalence and risk factors of self-reported NCDs from a cross sectional survey. *BMC Public Health*. 2021;21:2036.
27. Ekholuenetale M, Barrow A. Prevalence and determinants of self-reported high blood pressure among women of reproductive age in Benin: a population-based study. *Clin Hypertens*. 2020;26:12.
28. Chowdhury MAB, Epnere K, Haque MA, Mkuu RS. Urban rural differences in prevalence and risk factors of self-reported hypertension among Kenyan women: a population-based study. *J Hum Hypertens*. 2021;35:912–20.
29. Du M, Yin S, Wang P, Wang X, Wu J, Xue M, et al. Self-reported hypertension in Northern China: a cross-sectional study of a risk prediction model and age trends. *BMC Health Serv Res*. 2018;18:475.
30. Samanic CM, Barbour KE, Liu Y, Fang J, Lu H, Schieb L, et al. Prevalence of Self-Reported Hypertension and Antihypertensive Medication Use Among Adults - United States, 2017. *MMWR Morb Mortal Wkly Rep*. 2020;69:393–8.
31. Nahimana M-R, Nyandwi A, Muhimpundu MA, Olu O, Condo JU, Rusanganwa A, et al.

587 A population-based national estimate of the prevalence and risk factors associated with  
588 hypertension in Rwanda: implications for prevention and control. BMC Public Health.  
589 2017;18:2.

590 32. Mohamed SF, Mutua MK, Wamai R, Wekesah F, Haregu T, Juma P, et al. Prevalence,  
591 awareness, treatment and control of hypertension and their determinants: results from a  
592 national survey in Kenya. BMC Public Health. 2018;18 Suppl 3:1219.

593 33. Sun Z. Aging, Arterial Stiffness, and Hypertension. Hypertension. 2015;65:252–6.  
594 doi:10.1161/HYPERTENSIONAHA.114.03617.

595 34. Raghupathi V, Raghupathi W. The influence of education on health: an empirical  
596 assessment of OECD countries for the period 1995–2015. Arch Public Heal. 2020;78:20.  
597 doi:10.1186/s13690-020-00402-5.

598 35. Mohammadi F, Samouei R. Social determinants of health: Awareness and attitude of  
599 students and professors in medical sciences universities. J Educ Health Promot. 2023;12:155.

600 36. Liu M-Y, Li N, Li WA, Khan H. Association between psychosocial stress and  
601 hypertension: a systematic review and meta-analysis. Neurol Res. 2017;39:573–80.

602 37. Gordon AM, Mendes WB. A large-scale study of stress, emotions, and blood pressure in  
603 daily life using a digital platform. Proc Natl Acad Sci. 2021;118:e2105573118.  
604 doi:10.1073/pnas.2105573118.

605 38. Neufcourt L, Zins M, Berkman LF, Grimaud O. Socioeconomic disparities and risk of  
606 hypertension among older Americans: the Health and Retirement Study. J Hypertens.  
607 2021;39:2497–505.

608 39. Qin Z, Li C, Qi S, Zhou H, Wu J, Wang W, et al. Association of socioeconomic status  
609 with hypertension prevalence and control in Nanjing: a cross-sectional study. BMC Public  
610 Health. 2022;22:423. doi:10.1186/s12889-022-12799-5.

611 40. Mielke GI, Brown WJ, Nunes BP, Silva ICM, Hallal PC. Socioeconomic Correlates of

Sedentary Behavior in Adolescents: Systematic Review and Meta-Analysis. Sports Med. 2017;47:61–75.

41. Gong W-J, Fong DY-T, Wang M-P, Lam T-H, Chung TW-H, Ho S-Y. Increasing socioeconomic disparities in sedentary behaviors in Chinese children. BMC Public Health. 2019;19:754. doi:10.1186/s12889-019-7092-7.

42. Bauserman M, Nowak K, Nolen TL, Patterson J, Lokangaka A, Tshefu A, et al. The relationship between birth intervals and adverse maternal and neonatal outcomes in six low and lower-middle income countries. Reprod Health. 2020;17:157. doi:10.1186/s12978-020-01008-4.

637

638

639

640

641

642

643



**Table 1: Sociodemographic characteristics of the study participants (N=15254)**

| Variables              | Categories         | Total N=15254 | Self-Reported High BP |              |
|------------------------|--------------------|---------------|-----------------------|--------------|
|                        |                    |               | Yes (n=1014)          | No (n=14240) |
| <b>Age (Years)</b>     | 15-19              | 3142 (20.6%)  | 41 (4.0%)             | 3101 (21.8%) |
|                        | 20-24              | 2710 (17.8%)  | 94 (9.3%)             | 2616 (18.4%) |
|                        | 25-29              | 2500 (16.4%)  | 146 (14.4%)           | 2354 (16.5%) |
|                        | 30-34              | 2041 (13.4%)  | 148 (14.6%)           | 1893 (13.3%) |
|                        | 35-39              | 1882 (12.3%)  | 175 (17.3%)           | 1707 (12.0%) |
|                        | 40-44              | 1550 (10.2%)  | 174 (17.2%)           | 1376 (9.7%)  |
|                        | 45-49              | 1429 (9.4%)   | 236 (23.3%)           | 1193 (8.4%)  |
| <b>Education level</b> | No education       | 2387 (15.6%)  | 106 (10.5%)           | 2281 (16.0%) |
|                        | Primary            | 7413 (48.6%)  | 475 (46.8%)           | 6938 (48.7%) |
|                        | Secondary          | 5235 (34.3%)  | 409 (40.3%)           | 4826 (33.9%) |
|                        | Higher             | 219 (1.4%)    | 24 (2.4%)             | 195 (1.4%)   |
| <b>Marital status</b>  | Never married      | 4232 (27.7%)  | 121 (11.9%)           | 4111 (28.9%) |
|                        | Married            | 6751 (44.3%)  | 624 (61.5%)           | 6127 (43.0%) |
|                        | Cohabiting         | 2400 (15.7%)  | 100 (9.9%)            | 2300 (16.2%) |
|                        | Divorced/Separated | 1514 (9.9%)   | 132 (13.0%)           | 1382 (9.7%)  |
|                        | Widowed            | 357 (2.3%)    | 37 (3.6%)             | 320 (2.2%)   |
| <b>Residence</b>       | Urban              | 5441 (35.7%)  | 502 (49.5%)           | 4939 (34.7%) |
|                        | Rural              | 9813 (64.3%)  | 512 (50.5%)           | 9301 (65.3%) |

|                                    |                      |               |              |               |
|------------------------------------|----------------------|---------------|--------------|---------------|
| <b>Zone</b>                        | Western              | 1127 (7.4%)   | 39 (3.8%)    | 1088 (7.6%)   |
|                                    | Northern             | 1461 (9.6%)   | 103 (10.3%)  | 1358 (9.5%)   |
|                                    | Central              | 1328 (8.7%)   | 37 (3.6%)    | 1291 (9.1%)   |
|                                    | Southern Highlands   | 1209 (7.9%)   | 74 (7.3%)    | 1135 (8.0%)   |
|                                    | Southern             | 794 (5.2%)    | 22 (2.2%)    | 772 (5.4%)    |
|                                    | South West Highlands | 1767 (11.6%)  | 51 (5.0%)    | 1716 (12.1%)  |
|                                    | Lake                 | 3148 (20.6%)  | 112 (11.0%)  | 3036 (21.3%)  |
|                                    | Eastern              | 1852 (12.1%)  | 205 (20.2%)  | 1647(11.6%)   |
|                                    | Zanzibar             | 2568 (16.8%)  | 371 (36.6%)  | 2197 (15.4%)  |
| <b>Wealth status</b>               | Poorest              | 2271 (14.9%)  | 51 (5.0%)    | 2220 (15.6%)  |
|                                    | Poorer               | 2498 (16.4%)  | 77 (7.6%)    | 2421 (17.0%)  |
|                                    | Middle               | 3063 (20.1%)  | 170 (16.8%)  | 2893 (20.3%)  |
|                                    | Richer               | 3378 (22.1%)  | 241 (23.8%)  | 3137 (22.0%)  |
|                                    | Richest              | 4044 (26.5%)  | 475 (46.8%)  | 3569 (25.1%)  |
| <b>Smoke cigarette</b>             | Yes                  | 69 (0.5%)     | 5 (0.5%)     | 64 (0.4%)     |
|                                    | No                   | 15185 (99.5%) | 1009 (99.5%) | 14176 (99.6%) |
| <b>Currently working</b>           | Yes                  | 8923 (58.5%)  | 679 (67.0%)  | 8244 (57.9%)  |
|                                    | No                   | 6331 (41.5%)  | 335 (33.0%)  | 5996 (42.1%)  |
| <b>Covered by health insurance</b> | Yes                  | 868 (5.7%)    | 98 (9.7%)    | 770 (5.4%)    |
|                                    | No                   | 14386 (94.3%) | 916 (90.3%)  | 13470 (94.6%) |
| <b>Self-Reported Health Status</b> | Very good            | 3105 (20.4%)  | 214 (21.1%)  | 2891 (20.3%)  |

|                                         |                      |              |             |              |
|-----------------------------------------|----------------------|--------------|-------------|--------------|
|                                         | Good                 | 8042 (52.7%) | 496 (48.9%) | 7546 (53.0%) |
|                                         | Moderate             | 3956 (25.9%) | 278 (27.4%) | 3678 (25.8%) |
|                                         | Bad                  | 147 (1.0%)   | 25 (2.5%)   | 122 (0.9%)   |
|                                         | Very bad             | 4 (0.03%)    | 1 (0.1%)    | 3 (0.02%)    |
| <b>Visited HF in the Last 12 months</b> | Yes                  | 8207 (53.8%) | 661 (65.2%) | 7546 (53.0%) |
|                                         | No                   | 7047 (46.2%) | 353 (34.8%) | 6694 (47.0%) |
| <b>Total Children Ever Born</b>         | No Child             | 4138 (27.1%) | 121 (11.9%) | 4017 (28.2%) |
|                                         | 1 to 3 Children      | 6300 (41.3%) | 434 (42.8%) | 5866 (41.2%) |
|                                         | More than 3 Children | 4816 (31.6%) | 459 (45.3%) | 4357 (30.6%) |
| <b>Birth in Last 5 Years</b>            | No Birth             | 7573 (49.6%) | 554 (54.6%) | 7019 (49.3%) |
|                                         | Once or Twice        | 7324 (48.0%) | 440 (43.4%) | 6884 (48.3%) |
|                                         | More than Twice      | 357 (2.3%)   | 20 (2.0%)   | 337 (2.4%)   |

---

Table 2: Bivariate and multivariate analysis for factors associated with self-reported high blood pressure

| Variables              | Categories         | Self-Reported High BP |              | Crude               |           | Adjusted           |                     |
|------------------------|--------------------|-----------------------|--------------|---------------------|-----------|--------------------|---------------------|
|                        |                    | Yes n (%)             | No n (%)     | OR (95% CI)         | P-value   | OR (95% CI)        | P-value             |
| <b>Age (Years)</b>     | 15-19              | 41 (4.0%)             | 3101 (21.8%) | 1 (Reference)       |           | 1 (Reference)      |                     |
|                        | 20-24              | 94 (9.3%)             | 2616 (18.4%) | 2.72 (1.88-3.94)    | p < 0.001 | 2.45 (1.64-3.65)   | <b>p &lt; 0.001</b> |
|                        | 25-29              | 146 (14.4%)           | 2354 (16.5%) | 4.69 (3.30-6.66)    | p < 0.001 | 3.77 (2.48-5.71)   | <b>p &lt; 0.001</b> |
|                        | 30-34              | 148 (14.6%)           | 1893 (13.3%) | 5.91 (4.17-8.40)    | p < 0.001 | 4.60 (2.99-7.07)   | <b>p &lt; 0.001</b> |
|                        | 35-39              | 175 (17.3%)           | 1707 (12.0%) | 7.75 (5.49-10.95)   | p < 0.001 | 6.26 (4.04-9.70)   | <b>p &lt; 0.001</b> |
|                        | 40-44              | 174 (17.2%)           | 1376 (9.7%)  | 9.56 (6.77-13.52)   | p < 0.001 | 7.62 (4.86-11.95)  | <b>p &lt; 0.001</b> |
|                        | 45-49              | 236 (23.3%)           | 1193 (8.4%)  | 14.96 (10.67-20.99) | p < 0.001 | 11.78 (7.45-18.62) | <b>p &lt; 0.001</b> |
| <b>Education level</b> | No education       | 106 (10.5%)           | 2281 (16.0%) | 1 (Reference)       |           | 1 (Reference)      |                     |
|                        | Primary            | 475 (46.8%)           | 6938 (48.7%) | 1.47 (1.19-1.83)    | p < 0.001 | 1.17 (0.93-1.48)   | p=0.175             |
|                        | Secondary          | 409 (40.3%)           | 4826 (33.9%) | 1.82 (1.47-2.27)    | p < 0.001 | 1.76 (1.36-2.28)   | <b>p &lt; 0.001</b> |
|                        | Higher             | 24 (2.4%)             | 195 (1.4%)   | 2.65 (1.66-4.22)    | p < 0.001 | 1.47 (0.87-2.47)   | p=0.147             |
| <b>Marital status</b>  | Never married      | 121 (11.9%)           | 4111 (28.9%) | 1 (Reference)       |           | 1 (Reference)      |                     |
|                        | Married            | 624 (61.5%)           | 6127 (43.0%) | 3.46 (2.84-4.22)    | p < 0.001 | 1.57 (1.19-2.08)   | <b>p=0.002</b>      |
|                        | Cohabiting         | 100 (9.9%)            | 2300 (16.2%) | 1.48 (1.13-1.94)    | p=0.005   | 0.99 (0.71-1.38)   | p=0.933             |
|                        | Divorced/Separated | 132 (13.0%)           | 1382 (9.7%)  | 3.93 (2.67-5.78)    | p < 0.001 | 1.40 (0.89-2.18)   | p=0.145             |
|                        | Widowed            | 37 (3.6%)             | 320 (2.2%)   | 3.25 (2.52-4.18)    | p < 0.001 | 1.54 (1.11-2.12)   | <b>p=0.009</b>      |
| <b>Residence</b>       | Urban              | 502 (49.5%)           | 4939 (34.7%) | 1 (Reference)       |           | 1 (Reference)      |                     |
|                        | Rural              | 512 (50.5%)           | 9301 (65.3%) | 0.54 (0.48-0.62)    | p < 0.001 | 1.02 (0.86-1.20)   | p=0.853             |
| <b>Wealth status</b>   | Poorest            | 51 (5.0%)             | 2220 (15.6%) | 1 (Reference)       |           | -                  |                     |
|                        | Poorer             | 77 (7.6%)             | 2421 (17.0%) | 1.38 (0.97-1.98)    | p=0.075   | -                  | -                   |

|                                         |                 |              |               |                   |           |                  |                     |
|-----------------------------------------|-----------------|--------------|---------------|-------------------|-----------|------------------|---------------------|
|                                         | Middle          | 170 (16.8%)  | 2893 (20.3%)  | 2.56 (1.86-3.52)  | p < 0.001 | 2.28 (1.64-3.16) | <b>p &lt; 0.001</b> |
|                                         | Richer          | 241 (23.8%)  | 3137 (22.0%)  | 3.34 (2.46-4.55)  | p < 0.001 | 2.98 (2.14-4.15) | <b>p &lt; 0.001</b> |
|                                         | Richest         | 475 (46.8%)  | 3569 (25.1%)  | 5.79 (4.32-7.77)  | p < 0.001 | 5.06 (3.58-7.15) | <b>p &lt; 0.001</b> |
| <b>Smoke cigarette</b>                  | Yes             | 5 (0.5%)     | 64 (0.4%)     | 1.09 (0.44-2.73)  | p=0.841   | -                | -                   |
|                                         | No              | 1009 (99.5%) | 14176 (99.6%) | 1 (Reference)     |           | -                |                     |
| <b>Currently working</b>                | Yes             | 679 (67.0%)  | 8244 (57.9%)  | 1.47 (1.29-1.69)  | p < 0.001 | 0.88 (0.76-1.02) | p=0.098             |
|                                         | No              | 335 (33.0%)  | 5996 (42.1%)  | 1 (Reference)     |           | 1 (Reference)    |                     |
| <b>Covered by health insurance</b>      | Yes             | 98 (9.7%)    | 770 (5.4%)    | 1.87 (1.50-2.33)  | p < 0.001 | 0.91 (0.71-1.16) | p=0.437             |
|                                         | No              | 916 (90.3%)  | 13470 (94.6%) | 1 (Reference)     |           | 1 (Reference)    |                     |
| <b>Self-Reported Health Status</b>      | Very good       | 214 (21.1%)  | 2891 (20.3%)  | 1 (Reference)     |           | 1 (Reference)    |                     |
|                                         | Good            | 496 (48.9%)  | 7546 (53.0%)  | 0.89 (0.75-1.05)  | p=0.160   | -                | -                   |
|                                         | Moderate        | 278 (27.4%)  | 3678 (25.8%)  | 1.01 (0.85-1.23)  | p=0.825   | -                | -                   |
|                                         | Bad             | 25 (2.5%)    | 122 (0.9%)    | 2.77 (1.76-4.35)  | p < 0.001 | 2.87 (1.76-4.67) | <b>p &lt; 0.001</b> |
|                                         | Very bad        | 1 (0.1%)     | 3 (0.02%)     | 4.50 (0.47-43.48) | p=0.193   | -                | -                   |
| <b>Visited HF in the Last 12 months</b> | Yes             | 661 (65.2%)  | 7546 (53.0%)  | 1.66 (1.45-1.90)  | p < 0.001 | 1.38 (1.20-1.60) | <b>p &lt; 0.001</b> |
|                                         | No              | 353 (34.8%)  | 6694 (47.0%)  | 1 (Reference)     |           | 1 (Reference)    |                     |
| <b>Total Children Ever Born</b>         | No Child        | 121 (11.9%)  | 4017 (28.2%)  | 1 (Reference)     |           | 1 (Reference)    |                     |
|                                         | 1 to 3 Children | 434 (42.8%)  | 5866 (41.2%)  | 2.46 (2.00-3.02)  | p < 0.001 | 1.13 (0.84-1.54) | p=0.421             |
|                                         | >3 Children     | 459 (45.3%)  | 4357 (30.6%)  | 3.50 (2.85-4.29)  | p < 0.001 | 1.32 (0.93-1.88) | p=0.119             |

|                              |                 |             |              |                  |         |                  |                |
|------------------------------|-----------------|-------------|--------------|------------------|---------|------------------|----------------|
| <b>Birth in Last 5 Years</b> | No Birth        | 554 (54.6%) | 7019 (49.3%) | 1 (Reference)    |         | 1 (Reference)    |                |
|                              | Once or Twice   | 440 (43.4%) | 6884 (48.3%) | 0.81 (0.71-0.92) | p=0.001 | 0.80 (0.67-0.96) | <b>p=0.014</b> |
|                              | More than Twice | 20 (2.0%)   | 337 (2.4%)   | 0.75 (0.48-1.19) | p=0.224 | -                | -              |
